# Supplementary material for: Use of child restraint system and patterns of child transportation in Riyadh, Saudi Arabia
Source: PubMed Central journal article supplement (PMC5749838; doi:10.1371/journal.pone.0190471), 2018-01-02
Supplement: pone.0190471.s002.pdf [file pone.0190471.s002.pdf]

Please answer all the following:

1. **Gender:** Male  Female
2. **Age:** ..... years
3. **Education level:** 1/ less than secondary school  2/secondary school  3/ Bachelor  4/ Higher Study
4. **Relationship to the child:** 1/Father  2/Mother  3/Sibling  4/ Other .....
5. **Family member number:** .....
6. **Family member number less than 5 years** .....
7. **Monthly income in Saudi Riyal**

|                                          |                                       |                                        |                                        |                                           |
|------------------------------------------|---------------------------------------|----------------------------------------|----------------------------------------|-------------------------------------------|
| Less than 5,000 <input type="checkbox"/> | 5,000-10,000 <input type="checkbox"/> | 10,000-15,000 <input type="checkbox"/> | 15,000-20,000 <input type="checkbox"/> | More than 20,000 <input type="checkbox"/> |
|------------------------------------------|---------------------------------------|----------------------------------------|----------------------------------------|-------------------------------------------|

**8. How often do you use car seat belt?**

1. Never  2. Rarely  3. Sometimes  4. Often  5. Always .

**9. Is child restraint system available in your car at this moment?**

1. Yes  2. No

**10. If the answer is (Yes), how often do you use child restraint system?**

1. Never  2. Rarely  3. Sometimes  4. Often  5. Always .

**11. If you use child restraint system, how old is the child using? if there is more than one child, mention all the ages of children using**

1. Mention child/children age .....,.....,.....

**12. If child restraint system is unavailable, how does your child sit in the car?**

**You can pick more than one answer**

1. If adult passenger is available, child sits on passenger's lap in front seats
2. If adult passenger is available, child sits on passenger's lap in back seats
3. If vacant, child sits in back seat with car seat belt use
4. If vacant, child sits in back seat without car seat belt use
5. If vacant, child sits in front seat without car seat belt use
6. If vacant, child sits in front seat with car seat belt use
7. Child sits on driver's lap while driving

**13. Have you ever encountered a car accident while driving with a child?**

1. Yes .
2. No

**■ If the answer is (Yes), what was the protection method used for the child?**

- 1/ Car seat belt .
- 2/ Child restraint system .
- 3/ No protection
- 4/ other  .....

**■ What happened to the child during the accident?**

- 1/ No injury
- 2/ Simple wounds or bruises
- 3/ Fracture .
- 4/ Critical injury that required ICU admission
- 5/ Death .

**Please answer the following sentences**

|                                                                                         | <b>Strongly disagree</b> | <b>Disagree</b>          | <b>Neutral</b>           | <b>Agree</b>             | <b>Strongly agree</b>    |
|-----------------------------------------------------------------------------------------|--------------------------|--------------------------|--------------------------|--------------------------|--------------------------|
| <b>14.</b> Child restraint system is an essential device while driving with children    | <input type="checkbox"/> | <input type="checkbox"/> | <input type="checkbox"/> | <input type="checkbox"/> | <input type="checkbox"/> |
| <b>15.</b> I have enough information about child restraint system                       | <input type="checkbox"/> | <input type="checkbox"/> | <input type="checkbox"/> | <input type="checkbox"/> | <input type="checkbox"/> |
| <b>16.</b> Child restraint system is expensive                                          | <input type="checkbox"/> | <input type="checkbox"/> | <input type="checkbox"/> | <input type="checkbox"/> | <input type="checkbox"/> |
| <b>17.</b> Child restraint system is only important when driving fast                   | <input type="checkbox"/> | <input type="checkbox"/> | <input type="checkbox"/> | <input type="checkbox"/> | <input type="checkbox"/> |
| <b>18.</b> Child restraint system is not important for children more than two years old | <input type="checkbox"/> | <input type="checkbox"/> | <input type="checkbox"/> | <input type="checkbox"/> | <input type="checkbox"/> |
