# Supplementary material for: Use of child restraint system and patterns of child transportation in Riyadh, Saudi Arabia
Source: PLoS One. 2018 Jan 2;13(1):e0190471. doi: 10.1371/journal.pone.0190471 (PMC5749838; doi:10.1371/journal.pone.0190471)
Supplement: S1 File — (PDF) [file pone.0190471.s001.pdf]

نرجو الإجابة على جميع الاسئلة

1. الجنس : ذكر ☐ انثى ☐
2. العمر : ..... سنة
3. مستوى التعليم: 1/ أقل من ثانوي ☐ 2/ ثانوي ☐ 3/ جامعي ☐ 4/ دراسات عليا ☐
4. صلة القرابة بالأطفال : 1/ أب ☐ 2/ أم ☐ 3/ أخ أو أخت ☐ 4/ أخرى: حدد.....
5. عدد أفراد الاسرة : .....
6. عدد أفراد الأسرة ممن هم أقل من ٥ سنوات: .....
7. الدخل الشهري بالريال السعودي

|                                             |                                          |                                             |                                             |                                            |
|---------------------------------------------|------------------------------------------|---------------------------------------------|---------------------------------------------|--------------------------------------------|
| أقل من<br>٥,٠٠٠<br><input type="checkbox"/> | ٥,٠٠٠ - ٩٩٩٩<br><input type="checkbox"/> | ١٠,٠٠٠ - ١٤,٩٩٩<br><input type="checkbox"/> | ١٥,٠٠٠ - ٢٠,٠٠٠<br><input type="checkbox"/> | أكثر من ٢٠,٠٠٠<br><input type="checkbox"/> |
|---------------------------------------------|------------------------------------------|---------------------------------------------|---------------------------------------------|--------------------------------------------|

8. ما مدى استخدامك لحزام الأمان؟  
1. لا أستخدم ☐ 2. نادرا ☐ 3. بعض الأحيان ☐ 4. معظم الأحيان ☐ 5. دائما ☐
9. هل يتوفر حاليا الكرسي المخصص للأطفال في سيارتك الشخصية؟  
1. نعم ☐ 2. لا ☐
10. إذا كانت الإجابة (نعم)، ما مدى استخدامك لكراسي الأطفال؟  
1. لا أستخدم ☐ 2. نادرا ☐ 3. بعض الأحيان ☐ 4. معظم الأحيان ☐ 5. دائما ☐
11. في حال استخدامك للكراسي المخصصة للأطفال ، ماهو عمر الطفل المستخدم ؟ في حال وجود أكثر من طفل ، اذكر أعمار جميع الأطفال المستخدمين للكراسي المخصصة  
1. اذكر عمر الطفل/الأطفال ..... ، ..... ، .....

12. في حال عدم استخدام الكراسي المخصصة للأطفال، ماهي طريقة جلوس الطفل في السيارة؟ بإمكانك اختيار أكثر من اجابه

1. ☐ في حال وجود الأم او من ينوب عنها، يجلس الطفل في حجر(حضن) الراكب في الكرسي الأمامي.
2. ☐ في حال وجود الأم او من ينوب عنها، يجلس الطفل في حجر(حضن) الراكب في الكرسي الخلفي.
3. ☐ في حال عدم وجود احد، يجلس الطفل على كرسي السيارة الأمامي مع استخدام حزام الأمان.
4. ☐ في حال عدم وجود احد، يجلس الطفل على كرسي السيارة الأمامي مع عدم استخدام حزام الأمان.
5. ☐ في حال عدم وجود احد، يجلس الطفل على كرسي السيارة الخلفي مع استخدام حزام الامان.
6. ☐ في حال عدم وجود احد، يجلس الطفل على كرسي السيارة الخلفي مع عدم استخدام حزام الامان.
7. ☐ يجلس الطفل في حجر(حضن) السائق أثناء القيادة.

13. هل سبق وأن تعرضت إلى حادث سير مع وجود طفل مصاحب ؟

1. نعم ☐ 2. لا ☐

■ إذا كانت الإجابة (نعم)، كيف كانت طريقة حماية الطفل ؟

- 1/حزام امان السيارة ☐ 2/الكرسي المخصص للاطفال ☐
- 3/ لا يوجد حماية ☐ 4/ اخرى : اذكر .....

■ ماذا حدث للطفل أثناء الحادث ؟

- 1/لا يوجد اصابات ☐ 2/جروح بسيطة او كدمات ☐ 3/ كسور ☐
- 4/اصابة حرجة استدعت الدخول للعناية المركزة ☐ 5/ وفاة ☐

الرجاء الإجابة على العبارات التالية:

| غير موافق أبدا           | غير موافق                | محايد                    | موافق                    | موافق جدا                |                                                                                       |
|--------------------------|--------------------------|--------------------------|--------------------------|--------------------------|---------------------------------------------------------------------------------------|
| <input type="checkbox"/> | 14. لدي معلومات كافية عن كراسي السيارات المخصصة للأطفال                               |
| <input type="checkbox"/> | 15. تعتبر كراسي السيارات المخصصة للأطفال جزء أساسي في السيارة أثناء التنقل مع الأطفال |
| <input type="checkbox"/> | 16. كراسي الأطفال مهمة فقط إذا كان السائق يقود بسرعات عالية                           |
| <input type="checkbox"/> | 17. كراسي الأطفال غير مهمة لمن هم فوق سنتين                                           |
| <input type="checkbox"/> | 18. كراسي الأطفال مكلفة                                                               |
